# Supplementary material
Source: publisher figshare collection journal article supplement (https://acs.figshare.com/ndownloader/files/5155051)
Supplement: Supplementary file 1 [file 5155051]

data_General
_audit_creation_date                  '2004-08-20'
_audit_creation_method                'by CrystalStructure 3.6.0'
_audit_update_record                   ?

#==============================================================================

# PROCESSING SUMMARY (IUCr Office Use Only)

_journal_date_recd_electronic     ?
_journal_date_from_coeditor       ?
_journal_date_accepted            ?
_journal_coeditor_code            ?

#==============================================================================

# SUBMISSION DETAILS

_publ_contact_author_name             'Prof Dr. Hiroshi Shinokubo'
_publ_contact_author_email            'hshino@kuchem.kyoto-u.ac.jp'
_publ_contact_author_fax              '+81-75-753-40100'
_publ_contact_author_phone            '+81-75-753-4008'
_publ_contact_letter
;
    ENTER TEXT OF LETTER
;
_publ_requested_journal               'Organic Letters'

#==============================================================================

# TITLE AND AUTHOR LIST

_publ_section_title
;
    ENTER SECTION TITLE
;
_publ_section_title_footnote
;
    ENTER FOOTNOTE TO TITLE OF PAPER
;
loop_
_publ_author_name
_publ_author_footnote
_publ_author_address
'Yagi, Kazunari'
; Department of Material Chemistry 
 Graduate School of Engineering 
 Kyoto University 
 Kyoto 615-8510 
 Japan
;

'Shinokubo, Hiroshi'
; Department of Chemistry 
 Graduate School of Science 
 Kyoto University 
 Kyoto 606-8502 
 Japan
;
'Oshima, Koichiro'
; Department of Material Chemistry 
 Graduate School of Engineering 
 Kyoto University 
 Kyoto 615-8510 
 Japan
;


#==============================================================================

# TEXT

_publ_section_abstract
;
    ENTER ABSTRACT
;
_publ_section_comment
;
    ENTER TEXT
;
_publ_section_references
;
    ENTER OTHER REFERENCES

    Rigaku/MSC and Rigaku Corporation. (2004).
    CrystalStructure 3.6.0.
    Single Crystal Structure Analysis Software.
    Rigaku/MSC, 9009 New Trails Drive, The Woodlands, TX, USA 77381-5209.
    Rigaku, 3-9-12 Akishima, Tokyo 196-8666, Japan.

    Watkin, D.J., Prout, C.K. Carruthers, J.R. & Betteridge, P.W. (1996)
    CRYSTALS Issue 10, Chemical Crystallography Laboratory, Oxford, UK.

;
_publ_section_figure_captions
;
    ENTER FIGURE CAPTIONS
;
_publ_section_exptl_prep
;
    ENTER COMPOUND PREPARATION DETAILS
;
_publ_section_exptl_refinement
;
    ENTER SPECIAL DETAILS OF THE REFINEMENT
;

#==============================================================================

data__silylaziridine

#==============================================================================

# CHEMICAL DATA

_chemical_formula_sum                  'C26 H31 N Si '
_chemical_formula_moiety               'C26 H31 N Si '
_chemical_formula_weight               385.62
_chemical_melting_point                ?

#==============================================================================

# CRYSTAL DATA
_symmetry_cell_setting                 orthorhombic
_symmetry_space_group_name_H-M        'P b c a'
_symmetry_space_group_name_Hall       '-P 2ac 2ab'
_symmetry_Int_Tables_number            61
loop_
_symmetry_equiv_pos_site_id
_symmetry_equiv_pos_as_xyz
1   '+X,+Y,+Z'
2   '1/2-X,1/2+Y,+Z'
3   '+X,1/2-Y,1/2+Z'
4   '1/2-X,-Y,1/2+Z'
5   '-X,-Y,-Z'
6   '1/2+X,1/2-Y,-Z'
7   '-X,1/2+Y,1/2-Z'
8   '1/2+X,+Y,1/2-Z'

#------------------------------------------------------------------------------

_cell_length_a                         11.17(1)
_cell_length_b                         16.42(1)
_cell_length_c                         24.14(2)
_cell_angle_alpha                      90
_cell_angle_beta                       90
_cell_angle_gamma                      90
_cell_volume                           4425(6)
_cell_formula_units_Z                  8
_cell_measurement_reflns_used          30081
_cell_measurement_theta_min            3.0
_cell_measurement_theta_max            27.5
_cell_measurement_temperature          123.1

#------------------------------------------------------------------------------

_exptl_crystal_description            'prism'
_exptl_crystal_colour                 'colorless'
_exptl_crystal_size_max                0.60
_exptl_crystal_size_mid                0.50
_exptl_crystal_size_min                0.30
_exptl_crystal_density_diffrn          1.157
_exptl_crystal_density_meas            ?
_exptl_crystal_density_method         'not measured'
_exptl_crystal_F_000                   1664.00
_exptl_absorpt_coefficient_mu          0.117
_exptl_absorpt_correction_type         none

#==============================================================================

# EXPERIMENTAL DATA

_diffrn_radiation_type                'Mo K\a'
_diffrn_radiation_wavelength           0.7107
_diffrn_measurement_device_type       'Rigaku RAXIS-RAPID'
_diffrn_measurement_method             \w
_diffrn_detector_area_resol_mean       10.00
_diffrn_reflns_number                  40818
_diffrn_reflns_av_R_equivalents        0.030
_diffrn_reflns_theta_max               27.48
_diffrn_measured_fraction_theta_max    0.9959
_diffrn_reflns_theta_full              27.48
_diffrn_measured_fraction_theta_full   0.9959
_diffrn_reflns_limit_h_min             -14
_diffrn_reflns_limit_h_max             14
_diffrn_reflns_limit_k_min             -19
_diffrn_reflns_limit_k_max             21
_diffrn_reflns_limit_l_min             -31
_diffrn_reflns_limit_l_max             30

#==============================================================================

# REFINEMENT DATA

_refine_special_details
;
    Refinement using reflections with F^2^ > 3.0 sigma(F^2^).
    The weighted R-factor(wR), goodness of fit (S) and R-factor (gt) are 
    based on F, with F set to zero for negative F. The threshold expression of
    F^2^ > 2.0 sigma(F^2^) is used only for calculating R-factor (gt).
;
_reflns_number_total                   38586
_reflns_number_gt                      21704
_reflns_threshold_expression           F^2^>2.0\s(F^2^)
_refine_ls_structure_factor_coef       F
_refine_ls_R_factor_gt                 0.0540
_refine_ls_wR_factor_ref               0.0680
_refine_ls_hydrogen_treatment          refall
_refine_ls_number_reflns               21704
_refine_ls_number_parameters           284
_refine_ls_goodness_of_fit_ref         1.168
_refine_ls_weighting_scheme            calc
_refine_ls_weighting_details
'w = 1/[0.0010Fo^2^ + 3.0000\s(Fo^2^) + 0.5000]'
_refine_ls_shift/su_max                0.0000
_refine_diff_density_max               4.40
_refine_diff_density_min               -4.09
_refine_ls_extinction_method           none
_refine_ls_extinction_coef             ?

loop_
_atom_type_symbol
_atom_type_description
_atom_type_scat_dispersion_real
_atom_type_scat_dispersion_imag
_atom_type_scat_source
  'C' 'C'  0.003 0.002 
;
International Tables for Crystallography
(1992, Vol. C, Tables 4.2.6.8 and 6.1.1.4)
;
  'H' 'H'  0.000 0.000 
;
International Tables for Crystallography
(1992, Vol. C, Table 6.1.1.4)
;
  'N' 'N'  0.006 0.003 
;
International Tables for Crystallography
(1992, Vol. C, Tables 4.2.6.8 and 6.1.1.4)
;
  'Si' 'Si'  0.082 0.070 
;
International Tables for Crystallography
(1992, Vol. C, Tables 4.2.6.8 and 6.1.1.4)
;

#==============================================================================

# ATOMIC COORDINATES AND THERMAL PARAMETERS

loop_
_atom_site_label
_atom_site_type_symbol
_atom_site_fract_x
_atom_site_fract_y
_atom_site_fract_z
_atom_site_U_iso_or_equiv
_atom_site_adp_type
_atom_site_occupancy
_atom_site_symmetry_multiplicity
_atom_site_calc_flag
_atom_site_refinement_flags
_atom_site_disorder_assembly
_atom_site_disorder_group
 Si(1)  Si 0.89128(3)  0.20663(2)  0.56214(1)  0.01621(9)  Uani 1.00 1 d . . .
 N(1)   N  0.75256(9)  0.32198(6)  0.62150(4)  0.0160(3)   Uani 1.00 1 d . . .
 C(1)   C  0.8353(1)   0.24944(7)  0.63097(5)  0.0160(3)   Uani 1.00 1 d . . .
 C(2)   C  0.8642(1)   0.33511(7)  0.65068(5)  0.0171(3)   Uani 1.00 1 d . . .
 C(3)   C  0.9511(1)   0.39424(7)  0.62647(5)  0.0176(3)   Uani 1.00 1 d . . .
 C(4)   C  0.9109(1)   0.45714(7)  0.59254(5)  0.0205(4)   Uani 1.00 1 d . . .
 C(5)   C  0.9912(1)   0.51277(8)  0.57078(5)  0.0240(4)   Uani 1.00 1 d . . .
 C(6)   C  1.1118(1)   0.50733(8)  0.58283(5)  0.0262(4)   Uani 1.00 1 d . . .
 C(7)   C  1.1526(1)   0.44625(8)  0.61721(5)  0.0254(4)   Uani 1.00 1 d . . .
 C(8)   C  1.0725(1)   0.39025(8)  0.63951(5)  0.0203(4)   Uani 1.00 1 d . . .
 C(9)   C  0.6412(1)   0.33267(7)  0.64914(5)  0.0165(3)   Uani 1.00 1 d . . .
 C(10)  C  0.6261(1)   0.39131(8)  0.68979(5)  0.0234(4)   Uani 1.00 1 d . . .
 C(11)  C  0.5136(1)   0.40712(8)  0.71159(5)  0.0280(4)   Uani 1.00 1 d . . .
 C(12)  C  0.4156(1)   0.36441(9)  0.69310(5)  0.0274(4)   Uani 1.00 1 d . . .
 C(13)  C  0.4290(1)   0.30610(9)  0.65241(5)  0.0267(4)   Uani 1.00 1 d . . .
 C(14)  C  0.5411(1)   0.29037(8)  0.63045(5)  0.0224(4)   Uani 1.00 1 d . . .
 C(15)  C  0.8038(1)   0.19007(7)  0.67629(5)  0.0167(3)   Uani 1.00 1 d . . .
 C(16)  C  0.7083(1)   0.13650(8)  0.67051(5)  0.0219(4)   Uani 1.00 1 d . . .
 C(17)  C  0.6789(1)   0.08172(8)  0.71201(5)  0.0272(4)   Uani 1.00 1 d . . .
 C(18)  C  0.7465(1)   0.07869(8)  0.75983(6)  0.0308(4)   Uani 1.00 1 d . . .
 C(19)  C  0.8432(1)   0.12958(8)  0.76577(5)  0.0292(4)   Uani 1.00 1 d . . .
 C(20)  C  0.8723(1)   0.18490(8)  0.72454(5)  0.0222(4)   Uani 1.00 1 d . . .
 C(21)  C  0.9255(1)   0.29175(8)  0.51340(5)  0.0264(4)   Uani 1.00 1 d . . .
 C(22)  C  0.7677(1)   0.14682(8)  0.52978(5)  0.0272(4)   Uani 1.00 1 d . . .
 C(23)  C  1.0265(1)   0.13813(8)  0.57157(5)  0.0206(4)   Uani 1.00 1 d . . .
 C(24)  C  1.1261(1)   0.18300(9)  0.60349(6)  0.0346(4)   Uani 1.00 1 d . . .
 C(25)  C  1.0746(1)   0.11510(9)  0.51393(5)  0.0297(4)   Uani 1.00 1 d . . .
 C(26)  C  0.9960(1)   0.05961(8)  0.60283(6)  0.0327(4)   Uani 1.00 1 d . . .
 H(1)   H  0.8538      0.3418      0.6895      0.020       Uiso 1.00 1 c R . .
 H(2)   H  0.8281      0.4612      0.5841      0.023       Uiso 1.00 1 c R . .
 H(3)   H  0.9631      0.5553      0.5475      0.029       Uiso 1.00 1 c R . .
 H(4)   H  1.1664      0.5454      0.5674      0.032       Uiso 1.00 1 c R . .
 H(5)   H  1.2355      0.4426      0.6255      0.031       Uiso 1.00 1 c R . .
 H(6)   H  1.1006      0.3492      0.6640      0.023       Uiso 1.00 1 c R . .
 H(7)   H  0.6939      0.4208      0.7026      0.028       Uiso 1.00 1 c R . .
 H(8)   H  0.5043      0.4474      0.7396      0.034       Uiso 1.00 1 c R . .
 H(9)   H  0.3386      0.3753      0.7081      0.033       Uiso 1.00 1 c R . .
 H(10)  H  0.3613      0.2764      0.6397      0.031       Uiso 1.00 1 c R . .
 H(11)  H  0.5502      0.2507      0.6021      0.026       Uiso 1.00 1 c R . .
 H(12)  H  0.6625      0.1378      0.6373      0.027       Uiso 1.00 1 c R . .
 H(13)  H  0.6121      0.0465      0.7076      0.032       Uiso 1.00 1 c R . .
 H(14)  H  0.7264      0.0414      0.7884      0.037       Uiso 1.00 1 c R . .
 H(15)  H  0.8907      0.1270      0.7984      0.035       Uiso 1.00 1 c R . .
 H(16)  H  0.9392      0.2200      0.7290      0.026       Uiso 1.00 1 c R . .
 H(17)  H  0.8544      0.3072      0.4945      0.037       Uiso 1.00 1 c R . .
 H(18)  H  0.9558      0.3370      0.5335      0.038       Uiso 1.00 1 c R . .
 H(19)  H  0.9835      0.2742      0.4872      0.039       Uiso 1.00 1 c R . .
 H(20)  H  0.6929      0.1679      0.5417      0.036       Uiso 1.00 1 c R . .
 H(21)  H  0.7732      0.1510      0.4906      0.036       Uiso 1.00 1 c R . .
 H(22)  H  0.7741      0.0913      0.5404      0.036       Uiso 1.00 1 c R . .
 H(23)  H  1.0910      0.2214      0.6280      0.045       Uiso 1.00 1 c R . .
 H(24)  H  1.1769      0.2105      0.5781      0.046       Uiso 1.00 1 c R . .
 H(25)  H  1.1716      0.1447      0.6241      0.046       Uiso 1.00 1 c R . .
 H(26)  H  1.0577      0.1579      0.4886      0.041       Uiso 1.00 1 c R . .
 H(27)  H  1.1586      0.1066      0.5157      0.039       Uiso 1.00 1 c R . .
 H(28)  H  1.0364      0.0665      0.5018      0.040       Uiso 1.00 1 c R . .
 H(29)  H  1.0471      0.0168      0.5910      0.042       Uiso 1.00 1 c R . .
 H(30)  H  0.9150      0.0453      0.5956      0.042       Uiso 1.00 1 c R . .
 H(31)  H  1.0063      0.0683      0.6414      0.042       Uiso 1.00 1 c R . .


loop_
_atom_site_aniso_label
_atom_site_aniso_U_11
_atom_site_aniso_U_22
_atom_site_aniso_U_33
_atom_site_aniso_U_12
_atom_site_aniso_U_13
_atom_site_aniso_U_23
 Si(1)  0.0153(2)   0.0168(2)   0.0165(2)   0.0003(2)   0.0010(1)   0.0000(1)  
 N(1)   0.0135(6)   0.0148(6)   0.0198(5)   0.0001(5)   0.0010(5)   -0.0015(4) 
 C(1)   0.0131(7)   0.0154(7)   0.0196(7)   0.0004(6)   -0.0005(5)  0.0019(5)  
 C(2)   0.0163(8)   0.0179(7)   0.0169(6)   0.0001(5)   0.0003(5)   0.0001(5)  
 C(3)   0.0194(8)   0.0164(7)   0.0170(6)   -0.0013(6)  0.0016(5)   -0.0037(5) 
 C(4)   0.0161(8)   0.0184(7)   0.0269(7)   0.0017(6)   0.0021(6)   0.0011(5)  
 C(5)   0.0244(8)   0.0178(7)   0.0298(8)   0.0024(6)   0.0026(6)   0.0033(6)  
 C(6)   0.0258(9)   0.0217(8)   0.0311(7)   -0.0073(7)  0.0058(6)   -0.0008(6) 
 C(7)   0.0158(8)   0.0315(8)   0.0291(8)   -0.0035(6)  -0.0024(6)  -0.0016(6) 
 C(8)   0.0213(8)   0.0200(7)   0.0197(7)   -0.0002(6)  -0.0035(5)  -0.0005(5) 
 C(9)   0.0177(8)   0.0158(7)   0.0159(6)   -0.0002(5)  0.0016(5)   0.0049(5)  
 C(10)  0.0219(9)   0.0248(8)   0.0237(7)   0.0014(6)   0.0000(6)   0.0012(6)  
 C(11)  0.0323(9)   0.0288(8)   0.0228(7)   0.0124(7)   0.0042(6)   0.0006(6)  
 C(12)  0.0185(9)   0.0379(9)   0.0258(7)   0.0106(7)   0.0065(6)   0.0120(6)  
 C(13)  0.0167(8)   0.0363(9)   0.0272(7)   -0.0009(7)  -0.0015(6)  0.0085(7)  
 C(14)  0.0224(8)   0.0253(8)   0.0194(7)   0.0026(7)   0.0007(5)   0.0012(6)  
 C(15)  0.0177(7)   0.0139(7)   0.0184(6)   0.0028(5)   0.0052(5)   -0.0003(5) 
 C(16)  0.0211(8)   0.0209(7)   0.0238(7)   0.0009(6)   0.0014(6)   0.0023(6)  
 C(17)  0.0288(9)   0.0213(8)   0.0316(8)   -0.0050(6)  0.0118(7)   0.0017(6)  
 C(18)  0.046(1)    0.0204(8)   0.0263(8)   0.0000(7)   0.0111(7)   0.0062(6)  
 C(19)  0.043(1)    0.0248(8)   0.0197(7)   0.0039(7)   -0.0016(7)  0.0028(6)  
 C(20)  0.0252(9)   0.0188(7)   0.0226(7)   -0.0006(6)  0.0016(6)   -0.0013(5) 
 C(21)  0.0316(9)   0.0275(8)   0.0202(7)   0.0002(7)   0.0078(6)   -0.0004(6) 
 C(22)  0.0242(8)   0.0325(9)   0.0249(7)   -0.0041(7)  -0.0011(6)  -0.0044(6) 
 C(23)  0.0205(8)   0.0190(7)   0.0223(7)   0.0028(6)   -0.0023(6)  -0.0022(6) 
 C(24)  0.0288(9)   0.0387(9)   0.0362(8)   0.0105(7)   -0.0074(7)  -0.0089(7) 
 C(25)  0.0272(9)   0.0308(9)   0.0311(8)   0.0080(7)   0.0009(6)   -0.0027(7) 
 C(26)  0.038(1)    0.0257(8)   0.0344(8)   0.0126(7)   0.0027(7)   0.0025(7)  

#==============================================================================

_computing_data_collection            'PROCESS-AUTO'
_computing_cell_refinement            'PROCESS-AUTO'
_computing_data_reduction             'CrystalStructure'
_computing_structure_solution         'SIR97'
_computing_structure_refinement       'CRYSTALS'
_computing_publication_material       'CrystalStructure 3.6.0'
_computing_molecular_graphics          ?

#==============================================================================

# MOLECULAR GEOMETRY

_geom_special_details
;
    ENTER SPECIAL DETAILS OF THE MOLECULAR GEOMETRY
;

loop_
_geom_bond_atom_site_label_1
_geom_bond_atom_site_label_2
_geom_bond_distance
_geom_bond_publ_flag
_geom_bond_site_symmetry_1
_geom_bond_site_symmetry_2
Si(1)     C(1)      1.909(1)    ?     . .
Si(1)     C(21)     1.866(1)    ?     . .
Si(1)     C(22)     1.865(1)    ?     . .
Si(1)     C(23)     1.897(1)    ?     . .
N(1)      C(1)      1.524(2)    ?     . .
N(1)      C(2)      1.449(2)    ?     . .
N(1)      C(9)      1.422(2)    ?     . .
C(1)      C(2)      1.520(2)    ?     . .
C(1)      C(15)     1.507(2)    ?     . .
C(2)      C(3)      1.492(2)    ?     . .
C(3)      C(4)      1.392(2)    ?     . .
C(3)      C(8)      1.393(2)    ?     . .
C(4)      C(5)      1.384(2)    ?     . .
C(5)      C(6)      1.380(2)    ?     . .
C(6)      C(7)      1.379(2)    ?     . .
C(7)      C(8)      1.391(2)    ?     . .
C(9)      C(10)     1.385(2)    ?     . .
C(9)      C(14)     1.391(2)    ?     . .
C(10)     C(11)     1.387(2)    ?     . .
C(11)     C(12)     1.374(2)    ?     . .
C(12)     C(13)     1.380(2)    ?     . .
C(13)     C(14)     1.384(2)    ?     . .
C(15)     C(16)     1.390(2)    ?     . .
C(15)     C(20)     1.396(2)    ?     . .
C(16)     C(17)     1.385(2)    ?     . .
C(17)     C(18)     1.380(2)    ?     . .
C(18)     C(19)     1.373(2)    ?     . .
C(19)     C(20)     1.386(2)    ?     . .
C(23)     C(24)     1.540(2)    ?     . .
C(23)     C(25)     1.538(2)    ?     . .
C(23)     C(26)     1.532(2)    ?     . .
C(2)      H(1)      0.9499      ?     . .
C(4)      H(2)      0.9500      ?     . .
C(5)      H(3)      0.9500      ?     . .
C(6)      H(4)      0.9499      ?     . .
C(7)      H(5)      0.9501      ?     . .
C(8)      H(6)      0.9500      ?     . .
C(10)     H(7)      0.9500      ?     . .
C(11)     H(8)      0.9500      ?     . .
C(12)     H(9)      0.9500      ?     . .
C(13)     H(10)     0.9500      ?     . .
C(14)     H(11)     0.9500      ?     . .
C(16)     H(12)     0.9499      ?     . .
C(17)     H(13)     0.9500      ?     . .
C(18)     H(14)     0.9500      ?     . .
C(19)     H(15)     0.9500      ?     . .
C(20)     H(16)     0.9500      ?     . .
C(21)     H(17)     0.9501      ?     . .
C(21)     H(18)     0.9500      ?     . .
C(21)     H(19)     0.9500      ?     . .
C(22)     H(20)     0.9500      ?     . .
C(22)     H(21)     0.9500      ?     . .
C(22)     H(22)     0.9501      ?     . .
C(24)     H(23)     0.9500      ?     . .
C(24)     H(24)     0.9500      ?     . .
C(24)     H(25)     0.9500      ?     . .
C(25)     H(26)     0.9501      ?     . .
C(25)     H(27)     0.9500      ?     . .
C(25)     H(28)     0.9500      ?     . .
C(26)     H(29)     0.9500      ?     . .
C(26)     H(30)     0.9501      ?     . .
C(26)     H(31)     0.9499      ?     . .

loop_
_geom_angle_atom_site_label_1
_geom_angle_atom_site_label_2
_geom_angle_atom_site_label_3
_geom_angle
_geom_angle_publ_flag
_geom_angle_site_symmetry_1
_geom_angle_site_symmetry_2
_geom_angle_site_symmetry_3
Si(1)     C(1)      N(1)      110.84(8)   ?     . . .
Si(1)     C(1)      C(2)      122.91(9)   ?     . . .
Si(1)     C(1)      C(15)     118.03(8)   ?     . . .
C(21)     Si(1)     C(1)      109.87(5)   ?     . . .
C(22)     Si(1)     C(1)      108.41(6)   ?     . . .
C(23)     Si(1)     C(1)      112.01(5)   ?     . . .
C(22)     Si(1)     C(21)     106.36(6)   ?     . . .
C(23)     Si(1)     C(21)     110.90(6)   ?     . . .
C(23)     Si(1)     C(22)     109.10(6)   ?     . . .
Si(1)     C(23)     C(24)     110.56(9)   ?     . . .
Si(1)     C(23)     C(25)     108.37(8)   ?     . . .
Si(1)     C(23)     C(26)     112.36(9)   ?     . . .
N(1)      C(1)      C(2)      56.84(7)    ?     . . .
C(2)      N(1)      C(1)      61.42(8)    ?     . . .
N(1)      C(1)      C(15)     118.2(1)    ?     . . .
C(9)      N(1)      C(1)      123.78(9)   ?     . . .
N(1)      C(2)      C(1)      61.75(8)    ?     . . .
N(1)      C(2)      C(3)      117.8(1)    ?     . . .
C(9)      N(1)      C(2)      120.4(1)    ?     . . .
N(1)      C(9)      C(10)     121.6(1)    ?     . . .
N(1)      C(9)      C(14)     119.3(1)    ?     . . .
C(1)      C(2)      C(3)      128.2(1)    ?     . . .
C(15)     C(1)      C(2)      114.9(1)    ?     . . .
C(1)      C(15)     C(16)     121.0(1)    ?     . . .
C(1)      C(15)     C(20)     121.2(1)    ?     . . .
C(2)      C(3)      C(4)      120.2(1)    ?     . . .
C(2)      C(3)      C(8)      120.9(1)    ?     . . .
C(8)      C(3)      C(4)      118.8(1)    ?     . . .
C(3)      C(4)      C(5)      120.2(1)    ?     . . .
C(3)      C(8)      C(7)      120.5(1)    ?     . . .
C(4)      C(5)      C(6)      120.6(1)    ?     . . .
C(5)      C(6)      C(7)      119.8(1)    ?     . . .
C(6)      C(7)      C(8)      120.1(1)    ?     . . .
C(14)     C(9)      C(10)     118.6(1)    ?     . . .
C(9)      C(10)     C(11)     120.6(1)    ?     . . .
C(9)      C(14)     C(13)     120.6(1)    ?     . . .
C(10)     C(11)     C(12)     120.2(1)    ?     . . .
C(11)     C(12)     C(13)     119.9(1)    ?     . . .
C(12)     C(13)     C(14)     120.0(1)    ?     . . .
C(20)     C(15)     C(16)     117.8(1)    ?     . . .
C(15)     C(16)     C(17)     121.3(1)    ?     . . .
C(15)     C(20)     C(19)     120.7(1)    ?     . . .
C(16)     C(17)     C(18)     119.9(1)    ?     . . .
C(17)     C(18)     C(19)     119.7(1)    ?     . . .
C(18)     C(19)     C(20)     120.6(1)    ?     . . .
C(25)     C(23)     C(24)     108.5(1)    ?     . . .
C(26)     C(23)     C(24)     108.5(1)    ?     . . .
C(26)     C(23)     C(25)     108.4(1)    ?     . . .
Si(1)     C(21)     H(17)     109.3494    ?     . . .
Si(1)     C(21)     H(18)     109.7376    ?     . . .
Si(1)     C(21)     H(19)     109.3246    ?     . . .
Si(1)     C(22)     H(20)     109.3696    ?     . . .
Si(1)     C(22)     H(21)     109.3661    ?     . . .
Si(1)     C(22)     H(22)     109.6795    ?     . . .
N(1)      C(2)      H(1)      112.9800    ?     . . .
C(1)      C(2)      H(1)      112.9412    ?     . . .
H(1)      C(2)      C(3)      112.9888    ?     . . .
C(3)      C(4)      H(2)      119.5312    ?     . . .
C(3)      C(8)      H(6)      119.7137    ?     . . .
H(2)      C(4)      C(5)      120.2318    ?     . . .
C(4)      C(5)      H(3)      119.6641    ?     . . .
H(3)      C(5)      C(6)      119.6867    ?     . . .
C(5)      C(6)      H(4)      120.1308    ?     . . .
C(6)      C(7)      H(5)      119.6940    ?     . . .
H(4)      C(6)      C(7)      120.1163    ?     . . .
C(7)      C(8)      H(6)      119.8072    ?     . . .
H(5)      C(7)      C(8)      120.2512    ?     . . .
C(9)      C(10)     H(7)      119.1886    ?     . . .
C(9)      C(14)     H(11)     119.3367    ?     . . .
H(7)      C(10)     C(11)     120.2037    ?     . . .
C(10)     C(11)     H(8)      119.9096    ?     . . .
H(8)      C(11)     C(12)     119.8874    ?     . . .
C(11)     C(12)     H(9)      120.1330    ?     . . .
C(12)     C(13)     H(10)     119.9093    ?     . . .
H(9)      C(12)     C(13)     119.9653    ?     . . .
C(13)     C(14)     H(11)     120.0183    ?     . . .
H(10)     C(13)     C(14)     120.0566    ?     . . .
C(15)     C(16)     H(12)     118.9278    ?     . . .
C(15)     C(20)     H(16)     119.2184    ?     . . .
H(12)     C(16)     C(17)     119.7650    ?     . . .
C(16)     C(17)     H(13)     119.9258    ?     . . .
H(13)     C(17)     C(18)     120.1393    ?     . . .
C(17)     C(18)     H(14)     120.1765    ?     . . .
C(18)     C(19)     H(15)     119.8807    ?     . . .
H(14)     C(18)     C(19)     120.1195    ?     . . .
C(19)     C(20)     H(16)     120.0872    ?     . . .
H(15)     C(19)     C(20)     119.5690    ?     . . .
H(18)     C(21)     H(17)     109.4767    ?     . . .
H(19)     C(21)     H(17)     109.4606    ?     . . .
H(19)     C(21)     H(18)     109.4780    ?     . . .
H(21)     C(22)     H(20)     109.4728    ?     . . .
H(22)     C(22)     H(20)     109.4731    ?     . . .
H(22)     C(22)     H(21)     109.4660    ?     . . .
C(23)     C(24)     H(23)     109.3900    ?     . . .
C(23)     C(24)     H(24)     109.6053    ?     . . .
C(23)     C(24)     H(25)     109.4206    ?     . . .
C(23)     C(25)     H(26)     109.3265    ?     . . .
C(23)     C(25)     H(27)     109.9686    ?     . . .
C(23)     C(25)     H(28)     109.1192    ?     . . .
C(23)     C(26)     H(30)     109.2373    ?     . . .
C(23)     C(26)     H(31)     109.2033    ?     . . .
C(23)     C(26)     H(29)     109.9599    ?     . . .
H(24)     C(24)     H(23)     109.4695    ?     . . .
H(25)     C(24)     H(23)     109.4700    ?     . . .
H(25)     C(24)     H(24)     109.4718    ?     . . .
H(27)     C(25)     H(26)     109.4693    ?     . . .
H(28)     C(25)     H(26)     109.4672    ?     . . .
H(28)     C(25)     H(27)     109.4752    ?     . . .
H(30)     C(26)     H(29)     109.4733    ?     . . .
H(31)     C(26)     H(29)     109.4804    ?     . . .
H(31)     C(26)     H(30)     109.4720    ?     . . .

loop_
_geom_torsion_atom_site_label_1
_geom_torsion_atom_site_label_2
_geom_torsion_atom_site_label_3
_geom_torsion_atom_site_label_4
_geom_torsion
_geom_torsion_publ_flag
_geom_torsion_site_symmetry_1
_geom_torsion_site_symmetry_2
_geom_torsion_site_symmetry_3
_geom_torsion_site_symmetry_4
C(21)     Si(1)     C(1)      N(1)      39.68(9)    ?     . . . .
C(21)     Si(1)     C(1)      C(2)      -23.5(1)    ?     . . . .
C(21)     Si(1)     C(1)      C(15)     -179.41(8)  ?     . . . .
C(22)     Si(1)     C(1)      N(1)      -76.16(8)   ?     . . . .
C(22)     Si(1)     C(1)      C(2)      -139.36(9)  ?     . . . .
C(22)     Si(1)     C(1)      C(15)     64.8(1)     ?     . . . .
C(23)     Si(1)     C(1)      N(1)      163.40(6)   ?     . . . .
C(23)     Si(1)     C(1)      C(2)      100.2(1)    ?     . . . .
C(23)     Si(1)     C(1)      C(15)     -55.7(1)    ?     . . . .
C(1)      Si(1)     C(23)     C(24)     -54.3(1)    ?     . . . .
C(1)      Si(1)     C(23)     C(25)     -173.16(8)  ?     . . . .
C(1)      Si(1)     C(23)     C(26)     67.0(1)     ?     . . . .
C(21)     Si(1)     C(23)     C(24)     68.84(9)    ?     . . . .
C(21)     Si(1)     C(23)     C(25)     -50.01(9)   ?     . . . .
C(21)     Si(1)     C(23)     C(26)     -169.81(8)  ?     . . . .
C(22)     Si(1)     C(23)     C(24)     -174.34(8)  ?     . . . .
C(22)     Si(1)     C(23)     C(25)     66.81(9)    ?     . . . .
C(22)     Si(1)     C(23)     C(26)     -52.98(9)   ?     . . . .
C(2)      N(1)      C(1)      Si(1)     -116.47(9)  ?     . . . .
C(2)      N(1)      C(1)      C(15)     102.7(1)    ?     . . . .
C(9)      N(1)      C(1)      Si(1)     134.29(9)   ?     . . . .
C(9)      N(1)      C(1)      C(2)      -109.2(1)   ?     . . . .
C(9)      N(1)      C(1)      C(15)     -6.5(2)     ?     . . . .
C(1)      N(1)      C(2)      C(3)      120.7(1)    ?     . . . .
C(9)      N(1)      C(2)      C(1)      114.5(1)    ?     . . . .
C(9)      N(1)      C(2)      C(3)      -124.9(1)   ?     . . . .
C(1)      N(1)      C(9)      C(10)     108.0(1)    ?     . . . .
C(1)      N(1)      C(9)      C(14)     -80.0(1)    ?     . . . .
C(2)      N(1)      C(9)      C(10)     34.0(2)     ?     . . . .
C(2)      N(1)      C(9)      C(14)     -154.0(1)   ?     . . . .
Si(1)     C(1)      C(2)      N(1)      94.8(1)     ?     . . . .
Si(1)     C(1)      C(2)      C(3)      -9.8(2)     ?     . . . .
N(1)      C(1)      C(2)      C(3)      -104.5(1)   ?     . . . .
C(15)     C(1)      C(2)      N(1)      -108.7(1)   ?     . . . .
C(15)     C(1)      C(2)      C(3)      146.8(1)    ?     . . . .
Si(1)     C(1)      C(15)     C(16)     -65.8(1)    ?     . . . .
Si(1)     C(1)      C(15)     C(20)     111.8(1)    ?     . . . .
N(1)      C(1)      C(15)     C(16)     72.3(2)     ?     . . . .
N(1)      C(1)      C(15)     C(20)     -110.1(1)   ?     . . . .
C(2)      C(1)      C(15)     C(16)     136.5(1)    ?     . . . .
C(2)      C(1)      C(15)     C(20)     -45.9(2)    ?     . . . .
N(1)      C(2)      C(3)      C(4)      25.8(2)     ?     . . . .
N(1)      C(2)      C(3)      C(8)      -157.5(1)   ?     . . . .
C(1)      C(2)      C(3)      C(4)      100.4(1)    ?     . . . .
C(1)      C(2)      C(3)      C(8)      -82.9(2)    ?     . . . .
C(2)      C(3)      C(4)      C(5)      179.0(1)    ?     . . . .
C(8)      C(3)      C(4)      C(5)      2.2(2)      ?     . . . .
C(2)      C(3)      C(8)      C(7)      -179.3(1)   ?     . . . .
C(4)      C(3)      C(8)      C(7)      -2.5(2)     ?     . . . .
C(3)      C(4)      C(5)      C(6)      -0.7(2)     ?     . . . .
C(4)      C(5)      C(6)      C(7)      -0.5(2)     ?     . . . .
C(5)      C(6)      C(7)      C(8)      0.2(2)      ?     . . . .
C(6)      C(7)      C(8)      C(3)      1.4(2)      ?     . . . .
N(1)      C(9)      C(10)     C(11)     172.4(1)    ?     . . . .
C(14)     C(9)      C(10)     C(11)     0.4(2)      ?     . . . .
N(1)      C(9)      C(14)     C(13)     -172.8(1)   ?     . . . .
C(10)     C(9)      C(14)     C(13)     -0.6(2)     ?     . . . .
C(9)      C(10)     C(11)     C(12)     0.2(2)      ?     . . . .
C(10)     C(11)     C(12)     C(13)     -0.5(2)     ?     . . . .
C(11)     C(12)     C(13)     C(14)     0.3(2)      ?     . . . .
C(12)     C(13)     C(14)     C(9)      0.2(2)      ?     . . . .
C(1)      C(15)     C(16)     C(17)     180.0(1)    ?     . . . .
C(20)     C(15)     C(16)     C(17)     2.3(2)      ?     . . . .
C(1)      C(15)     C(20)     C(19)     -179.5(1)   ?     . . . .
C(16)     C(15)     C(20)     C(19)     -1.8(2)     ?     . . . .
C(15)     C(16)     C(17)     C(18)     -1.1(2)     ?     . . . .
C(16)     C(17)     C(18)     C(19)     -0.6(2)     ?     . . . .
C(17)     C(18)     C(19)     C(20)     1.1(2)      ?     . . . .
C(18)     C(19)     C(20)     C(15)     0.1(2)      ?     . . . .

loop_
_geom_contact_atom_site_label_1
_geom_contact_atom_site_label_2
_geom_contact_distance
_geom_contact_publ_flag
_geom_contact_site_symmetry_1
_geom_contact_site_symmetry_2
Si(1)     N(1)      2.835(1)    ?     . .
Si(1)     C(2)      3.018(1)    ?     . .
Si(1)     C(3)      3.513(1)    ?     . .
Si(1)     C(15)     2.936(1)    ?     . .
Si(1)     C(16)     3.514(1)    ?     . .
Si(1)     C(24)     2.832(1)    ?     . .
Si(1)     C(25)     2.793(1)    ?     . .
Si(1)     C(26)     2.856(1)    ?     . .
N(1)      C(3)      2.518(2)    ?     . .
N(1)      C(4)      2.922(2)    ?     . .
N(1)      C(10)     2.451(2)    ?     . .
N(1)      C(14)     2.427(2)    ?     . .
N(1)      C(15)     2.601(2)    ?     . .
N(1)      C(16)     3.304(2)    ?     . .
N(1)      C(21)     3.284(2)    ?     . .
C(1)      C(3)      2.709(2)    ?     . .
C(1)      C(8)      3.522(2)    ?     . .
C(1)      C(9)      2.599(2)    ?     . .
C(1)      C(10)     3.591(2)    ?     . .
C(1)      C(14)     3.353(2)    ?     . .
C(1)      C(16)     2.522(2)    ?     . .
C(1)      C(20)     2.529(2)    ?     . .
C(1)      C(21)     3.090(2)    ?     . .
C(1)      C(22)     3.061(2)    ?     . .
C(1)      C(23)     3.156(2)    ?     . .
C(1)      C(24)     3.490(2)    ?     . .
C(2)      C(4)      2.501(2)    ?     . .
C(2)      C(8)      2.510(2)    ?     . .
C(2)      C(9)      2.492(2)    ?     . .
C(2)      C(10)     2.969(2)    ?     . .
C(2)      C(15)     2.551(2)    ?     . .
C(2)      C(20)     3.044(2)    ?     . .
C(2)      C(21)     3.457(2)    ?     . .
C(3)      C(5)      2.407(2)    ?     . .
C(3)      C(6)      2.789(2)    ?     . .
C(3)      C(7)      2.417(2)    ?     . .
C(3)      C(21)     3.219(2)    ?     . .
C(4)      C(6)      2.401(2)    ?     . .
C(4)      C(7)      2.770(2)    ?     . .
C(4)      C(8)      2.397(2)    ?     . .
C(4)      C(21)     3.324(2)    ?     . .
C(5)      C(7)      2.386(2)    ?     . .
C(5)      C(8)      2.761(2)    ?     . .
C(6)      C(8)      2.400(2)    ?     . .
C(8)      C(24)     3.562(2)    ?     . .
C(9)      C(11)     2.408(2)    ?     . .
C(9)      C(12)     2.784(2)    ?     . .
C(9)      C(13)     2.411(2)    ?     . .
C(9)      C(15)     3.035(2)    ?     . .
C(9)      C(16)     3.346(2)    ?     . .
C(10)     C(12)     2.394(2)    ?     . .
C(10)     C(13)     2.760(2)    ?     . .
C(10)     C(14)     2.387(2)    ?     . .
C(11)     C(13)     2.384(2)    ?     . .
C(11)     C(14)     2.758(2)    ?     . .
C(12)     C(14)     2.394(2)    ?     . .
C(14)     C(15)     3.542(2)    ?     . .
C(14)     C(16)     3.286(2)    ?     . .
C(15)     C(17)     2.420(2)    ?     . .
C(15)     C(18)     2.796(2)    ?     . .
C(15)     C(19)     2.417(2)    ?     . .
C(15)     C(26)     3.512(2)    ?     . .
C(16)     C(18)     2.394(2)    ?     . .
C(16)     C(19)     2.751(2)    ?     . .
C(16)     C(20)     2.385(2)    ?     . .
C(16)     C(22)     3.465(2)    ?     . .
C(17)     C(19)     2.381(2)    ?     . .
C(17)     C(20)     2.761(2)    ?     . .
C(18)     C(20)     2.396(2)    ?     . .
C(21)     C(22)     2.987(2)    ?     . .
C(21)     C(23)     3.099(2)    ?     . .
C(21)     C(24)     3.597(2)    ?     . .
C(21)     C(25)     3.344(2)    ?     . .
C(22)     C(23)     3.065(2)    ?     . .
C(22)     C(25)     3.488(2)    ?     . .
C(22)     C(26)     3.414(2)    ?     . .
C(24)     C(25)     2.499(2)    ?     . .
C(24)     C(26)     2.493(2)    ?     . .
C(25)     C(26)     2.491(2)    ?     . .
Si(1)     H(12)     3.3319      ?     . .
Si(1)     H(17)     2.3580      ?     . .
Si(1)     H(18)     2.3627      ?     . .
Si(1)     H(19)     2.3576      ?     . .
Si(1)     H(20)     2.3571      ?     . .
Si(1)     H(21)     2.3571      ?     . .
Si(1)     H(22)     2.3610      ?     . .
Si(1)     H(23)     2.7501      ?     . .
Si(1)     H(24)     3.2135      ?     . .
Si(1)     H(26)     2.6918      ?     . .
Si(1)     H(27)     3.5880      ?     . .
Si(1)     H(28)     3.1677      ?     . .
Si(1)     H(30)     2.7816      ?     . .
Si(1)     H(31)     3.2353      ?     . .
N(1)      H(1)      2.0188      ?     . .
N(1)      H(2)      2.5985      ?     . .
N(1)      H(7)      2.6253      ?     . .
N(1)      H(11)     2.5876      ?     . .
N(1)      H(12)     3.2100      ?     . .
N(1)      H(17)     3.2773      ?     . .
N(1)      H(18)     3.1193      ?     . .
N(1)      H(20)     3.2474      ?     . .
C(1)      H(1)      2.0826      ?     . .
C(1)      H(6)      3.4787      ?     . .
C(1)      H(11)     3.2593      ?     . .
C(1)      H(12)     2.6660      ?     . .
C(1)      H(16)     2.6790      ?     . .
C(1)      H(17)     3.4334      ?     . .
C(1)      H(18)     3.0691      ?     . .
C(1)      H(20)     2.9927      ?     . .
C(1)      H(22)     3.4617      ?     . .
C(1)      H(23)     2.8938      ?     . .
C(1)      H(30)     3.5715      ?     . .
C(1)      H(31)     3.5428      ?     . .
C(2)      H(2)      2.6522      ?     . .
C(2)      H(6)      2.6694      ?     . .
C(2)      H(7)      2.6779      ?     . .
C(2)      H(16)     2.8006      ?     . .
C(2)      H(18)     3.0084      ?     . .
C(2)      H(23)     3.1929      ?     . .
C(3)      H(1)      2.0578      ?     . .
C(3)      H(2)      2.0360      ?     . .
C(3)      H(3)      3.2624      ?     . .
C(3)      H(5)      3.2745      ?     . .
C(3)      H(6)      2.0384      ?     . .
C(3)      H(7)      3.4381      ?     . .
C(3)      H(13)     3.2529      ?     . 65502
C(3)      H(18)     2.4337      ?     . .
C(3)      H(23)     3.2388      ?     . .
C(4)      H(1)      3.0764      ?     . .
C(4)      H(3)      2.0295      ?     . .
C(4)      H(4)      3.2579      ?     . .
C(4)      H(6)      3.2565      ?     . .
C(4)      H(12)     3.2613      ?     . 65502
C(4)      H(13)     3.1509      ?     . 65502
C(4)      H(17)     3.4714      ?     . .
C(4)      H(18)     2.4844      ?     . .
C(4)      H(22)     3.2711      ?     . 65502
C(5)      H(2)      2.0351      ?     . .
C(5)      H(4)      2.0304      ?     . .
C(5)      H(5)      3.2431      ?     . .
C(5)      H(12)     3.1212      ?     . 65502
C(5)      H(13)     3.5411      ?     . 65502
C(5)      H(18)     3.0481      ?     . .
C(5)      H(20)     3.3481      ?     . 65502
C(5)      H(22)     3.3136      ?     . 65502
C(6)      H(2)      3.2580      ?     . .
C(6)      H(3)      2.0261      ?     . .
C(6)      H(5)      2.0255      ?     . .
C(6)      H(6)      3.2549      ?     . .
C(6)      H(18)     3.5027      ?     . .
C(7)      H(3)      3.2428      ?     . .
C(7)      H(4)      2.0295      ?     . .
C(7)      H(6)      2.0375      ?     . .
C(7)      H(9)      3.2376      ?     . 65501
C(7)      H(18)     3.4826      ?     . .
C(8)      H(1)      2.8377      ?     . .
C(8)      H(2)      3.2558      ?     . .
C(8)      H(4)      3.2586      ?     . .
C(8)      H(5)      2.0419      ?     . .
C(8)      H(9)      3.4103      ?     . 65501
C(8)      H(18)     3.0018      ?     . .
C(8)      H(23)     2.7929      ?     . .
C(8)      H(24)     3.5024      ?     . .
C(9)      H(1)      2.5703      ?     . .
C(9)      H(2)      3.3578      ?     . .
C(9)      H(7)      2.0257      ?     . .
C(9)      H(8)      3.2628      ?     . .
C(9)      H(10)     3.2675      ?     . .
C(9)      H(11)     2.0329      ?     . .
C(9)      H(12)     3.2212      ?     . .
C(10)     H(1)      2.6694      ?     . .
C(10)     H(2)      3.5938      ?     . .
C(10)     H(8)      2.0349      ?     . .
C(10)     H(9)      3.2528      ?     . .
C(10)     H(11)     3.2444      ?     . .
C(10)     H(30)     3.4310      ?     . 65502
C(10)     H(31)     3.4636      ?     . 65502
C(11)     H(7)      2.0378      ?     . .
C(11)     H(9)      2.0255      ?     . .
C(11)     H(10)     3.2410      ?     . .
C(11)     H(29)     3.4883      ?     . 65502
C(11)     H(31)     3.1500      ?     . 65502
C(12)     H(5)      2.8900      ?     . 45501
C(12)     H(6)      3.5961      ?     . 45501
C(12)     H(7)      3.2513      ?     . .
C(12)     H(8)      2.0230      ?     . .
C(12)     H(10)     2.0281      ?     . .
C(12)     H(11)     3.2511      ?     . .
C(12)     H(29)     3.5356      ?     . 65502
C(13)     H(5)      3.1797      ?     . 45501
C(13)     H(8)      3.2415      ?     . .
C(13)     H(9)      2.0286      ?     . .
C(13)     H(11)     2.0332      ?     . .
C(14)     H(7)      3.2445      ?     . .
C(14)     H(9)      3.2516      ?     . .
C(14)     H(10)     2.0336      ?     . .
C(14)     H(12)     2.8534      ?     . .
C(14)     H(20)     3.3907      ?     . .
C(15)     H(1)      2.5729      ?     . .
C(15)     H(11)     3.4965      ?     . .
C(15)     H(12)     2.0281      ?     . .
C(15)     H(13)     3.2727      ?     . .
C(15)     H(15)     3.2705      ?     . .
C(15)     H(16)     2.0359      ?     . .
C(15)     H(20)     3.4946      ?     . .
C(15)     H(23)     3.4506      ?     . .
C(15)     H(30)     3.3143      ?     . .
C(15)     H(31)     3.1326      ?     . .
C(16)     H(2)      3.5776      ?     . 64502
C(16)     H(11)     3.0596      ?     . .
C(16)     H(13)     2.0335      ?     . .
C(16)     H(14)     3.2531      ?     . .
C(16)     H(16)     3.2444      ?     . .
C(16)     H(20)     3.1549      ?     . .
C(16)     H(22)     3.3087      ?     . .
C(16)     H(30)     3.2933      ?     . .
C(16)     H(31)     3.5812      ?     . .
C(17)     H(7)      3.0079      ?     . 64502
C(17)     H(12)     2.0318      ?     . .
C(17)     H(14)     2.0306      ?     . .
C(17)     H(15)     3.2388      ?     . .
C(18)     H(7)      3.0118      ?     . 64502
C(18)     H(8)      3.5553      ?     . 64502
C(18)     H(12)     3.2496      ?     . .
C(18)     H(13)     2.0303      ?     . .
C(18)     H(15)     2.0219      ?     . .
C(18)     H(16)     3.2517      ?     . .
C(19)     H(8)      3.5005      ?     . 64502
C(19)     H(13)     3.2396      ?     . .
C(19)     H(14)     2.0242      ?     . .
C(19)     H(16)     2.0355      ?     . .
C(20)     H(1)      2.7198      ?     . .
C(20)     H(12)     3.2433      ?     . .
C(20)     H(14)     3.2536      ?     . .
C(20)     H(15)     2.0304      ?     . .
C(20)     H(23)     3.4280      ?     . .
C(20)     H(31)     3.1501      ?     . .
C(21)     H(2)      3.4399      ?     . .
C(21)     H(20)     3.3687      ?     . .
C(21)     H(21)     2.9219      ?     . .
C(21)     H(23)     3.5220      ?     . .
C(21)     H(24)     3.4786      ?     . .
C(21)     H(26)     2.7148      ?     . .
C(22)     H(2)      3.4853      ?     . 64502
C(22)     H(3)      3.0143      ?     . 64502
C(22)     H(11)     3.4437      ?     . .
C(22)     H(12)     2.8536      ?     . .
C(22)     H(17)     2.9317      ?     . .
C(22)     H(19)     3.3513      ?     . .
C(22)     H(26)     3.3925      ?     . .
C(22)     H(28)     3.3460      ?     . .
C(22)     H(30)     2.8297      ?     . .
C(23)     H(18)     3.4833      ?     . .
C(23)     H(19)     3.0596      ?     . .
C(23)     H(21)     3.4449      ?     . .
C(23)     H(22)     3.0176      ?     . .
C(23)     H(23)     2.0606      ?     . .
C(23)     H(24)     2.0631      ?     . .
C(23)     H(25)     2.0609      ?     . .
C(23)     H(26)     2.0583      ?     . .
C(23)     H(27)     2.0657      ?     . .
C(23)     H(28)     2.0558      ?     . .
C(23)     H(29)     2.0601      ?     . .
C(23)     H(30)     2.0517      ?     . .
C(23)     H(31)     2.0512      ?     . .
C(24)     H(6)      3.1080      ?     . .
C(24)     H(10)     3.1660      ?     . 65501
C(24)     H(18)     3.5870      ?     . .
C(24)     H(19)     3.5565      ?     . .
C(24)     H(26)     2.9056      ?     . .
C(24)     H(27)     2.4903      ?     . .
C(24)     H(28)     3.2678      ?     . .
C(24)     H(29)     2.8842      ?     . .
C(24)     H(30)     3.2714      ?     . .
C(24)     H(31)     2.4842      ?     . .
C(25)     H(19)     2.8755      ?     . .
C(25)     H(21)     3.4631      ?     . .
C(25)     H(22)     3.4391      ?     . .
C(25)     H(23)     3.2658      ?     . .
C(25)     H(24)     2.4809      ?     . .
C(25)     H(25)     2.9131      ?     . .
C(25)     H(29)     2.4824      ?     . .
C(25)     H(30)     2.8937      ?     . .
C(25)     H(31)     3.2623      ?     . .
C(26)     H(22)     2.9460      ?     . .
C(26)     H(23)     2.9250      ?     . .
C(26)     H(24)     3.2523      ?     . .
C(26)     H(25)     2.4628      ?     . .
C(26)     H(26)     3.2680      ?     . .
C(26)     H(27)     2.8850      ?     . .
C(26)     H(28)     2.4818      ?     . .
H(2)      C(16)     3.5776      ?     . 65502
H(2)      C(22)     3.4853      ?     . 65502
H(3)      C(22)     3.0143      ?     . 65502
H(5)      C(12)     2.8900      ?     . 65501
H(5)      C(13)     3.1797      ?     . 65501
H(6)      C(12)     3.5961      ?     . 65501
H(7)      C(17)     3.0079      ?     . 65502
H(7)      C(18)     3.0118      ?     . 65502
H(8)      C(18)     3.5553      ?     . 65502
H(8)      C(19)     3.5005      ?     . 65502
H(9)      C(7)      3.2376      ?     . 45501
H(9)      C(8)      3.4103      ?     . 45501
H(10)     C(24)     3.1660      ?     . 45501
H(12)     C(4)      3.2613      ?     . 64502
H(12)     C(5)      3.1212      ?     . 64502
H(13)     C(3)      3.2529      ?     . 64502
H(13)     C(4)      3.1509      ?     . 64502
H(13)     C(5)      3.5411      ?     . 64502
H(20)     C(5)      3.3481      ?     . 64502
H(22)     C(4)      3.2711      ?     . 64502
H(22)     C(5)      3.3136      ?     . 64502
H(29)     C(11)     3.4883      ?     . 64502
H(29)     C(12)     3.5356      ?     . 64502
H(30)     C(10)     3.4310      ?     . 64502
H(31)     C(10)     3.4636      ?     . 64502
H(31)     C(11)     3.1500      ?     . 64502

#==============================================================================

# Additional structures and associated data_? identifiers
# should be added at this point if there is more than one 
# structure analysis in the CIF.

#==============================================================================

#     End of CIF

#==============================================================================
